# Supplementary material
Source: publisher site journal article supplement (https://www.spandidos-publications.com/2429/downloadSupplementary)
Supplement: Supplementary file 1 [file downloadSupplementary]

## Sheet: Pathway
First Category	Second Category	BPA Number
Environmental Information Processing	Signal transduction	42
Cellular Processes	Transport and catabolism	27
Genetic Information Processing	Translation	25
Organismal Systems	Immune system	25
Human Diseases	Neurodegenerative diseases	23
Cellular Processes	Cellular community - eukaryotes	20
Human Diseases	Cancers: Overview	20
Genetic Information Processing	Folding, sorting and degradation	16
Organismal Systems	Endocrine system	16
Human Diseases	Infectious diseases: Bacterial	16
Metabolism	Carbohydrate metabolism	15
Metabolism	Energy metabolism	13
Human Diseases	Endocrine and metabolic diseases	13
Cellular Processes	Cell growth and death	12
Human Diseases	Infectious diseases: Viral	12
Metabolism	Amino acid metabolism	10
Metabolism	Global and overview maps	10
Cellular Processes	Cell motility	10
Human Diseases	Cancers: Specific types	10
Metabolism	Metabolism of cofactors and vitamins	9
Organismal Systems	Circulatory system	9
Organismal Systems	Nervous system	9
Metabolism	Nucleotide metabolism	8
Human Diseases	Cardiovascular diseases	8
Metabolism	Glycan biosynthesis and metabolism	7
Genetic Information Processing	Transcription	7
Organismal Systems	Digestive system	7
Human Diseases	Drug resistance: Antineoplastic	7
Human Diseases	Immune diseases	7
Human Diseases	Substance dependence	7
Metabolism	Lipid metabolism	6
Metabolism	Metabolism of other amino acids	6
Metabolism	Xenobiotics biodegradation and metabolism	5
Environmental Information Processing	Signaling molecules and interaction	5
Organismal Systems	Aging	5
Human Diseases	Infectious diseases: Parasitic	5
Genetic Information Processing	Replication and repair	4
Organismal Systems	Excretory system	4
Organismal Systems	Development	3
Organismal Systems	Sensory system	3
Organismal Systems	Environmental adaptation	1

## Sheet: Sheet1
Table SIX. KEGG Analysis of Proteins between BPA and control group.
pathway ID	Description	BPA UPDOWN numbers	BPA UPDOWN proteins
hsa05016	Huntington's disease	16	P21912(hsa:6390);P06576(hsa:506);P05141(hsa:292);Q9UFH2(hsa:8632);Q99643(hsa:6391);A0A075B6F3(hsa:1769);P00156(hsa:4519);Q9UJW0(hsa:51164);P04179(hsa:6648);P12236(hsa:293);P56381(hsa:514);P00403(hsa:4513);P00395(hsa:4512);P19388(hsa:5434);P03928(hsa:4509);A0A1C7CYW8(hsa:196385)
hsa03010	Ribosome	15	P50914(hsa:9045);Q9Y3D3(hsa:51021);H0YMV8(hsa:51065);O75394(hsa:9553);P05386(hsa:6176);A0A2R8Y851(hsa:6235);P61313(hsa:6138);P62979(hsa:7311;hsa:6233;hsa:7316;hsa:7314);P46781(hsa:6203);A0A2R8YD14(hsa:6229);Q9BYD1(hsa:28998);Q9BYC8(hsa:64983);P84098(hsa:6143);P62277(hsa:6207);I3L0E3(hsa:51373)
hsa00190	Oxidative phosphorylation	13	P21912(hsa:6390);P06576(hsa:506);Q9Y5K8(hsa:51382);Q99643(hsa:6391);O75348(hsa:9550);P00395(hsa:4512);P03928(hsa:4509);P56381(hsa:514);P03891(hsa:4536);P00403(hsa:4513);P00156(hsa:4519);Q7KZN9(hsa:1355);G3V325(hsa:9551;hsa:26024;hsa:100526740)
hsa05012	Parkinson's disease	13	P21912(hsa:6390);P06576(hsa:506);P05141(hsa:292);P37840(hsa:6622);Q99643(hsa:6391);P00395(hsa:4512);P12236(hsa:293);P56381(hsa:514);P03891(hsa:4536);P00403(hsa:4513);P00156(hsa:4519);P62979(hsa:7311;hsa:6233;hsa:7316;hsa:7314);P03928(hsa:4509)
hsa04144	Endocytosis	12	P37173(hsa:7048);Q9Y2X7(hsa:28964);Q9NP61(hsa:26286);Q14161(hsa:9815);O95630(hsa:10617);Q9Y6D6(hsa:10565);F8WCF6(hsa:10093;hsa:100526693);Q96P48(hsa:116985);Q5SW96(hsa:26119);O15145(hsa:10094);P61026(hsa:10890);Q8WUX9(hsa:91782)
hsa05010	Alzheimer's disease	12	P21912(hsa:6390);P06576(hsa:506);P37840(hsa:6622);Q99643(hsa:6391);P55957(hsa:637);P00395(hsa:4512);P56381(hsa:514);P00403(hsa:4513);P00156(hsa:4519);P02649(hsa:348);P04406(hsa:2597);P03928(hsa:4509)
hsa04810	Regulation of actin cytoskeleton	10	O15145(hsa:10094);Q9Y2X7(hsa:28964);Q96II5(hsa:369);P62070(hsa:22800);P62136(hsa:5499);P38570(hsa:3682);F8WCF6(hsa:10093;hsa:100526693);E9PC47(hsa:3984);A0A2R8YEA7(hsa:71;hsa:60);Q86VI3(hsa:128239)
hsa05205	Proteoglycans in cancer	10	P04004(hsa:7448);Q96II5(hsa:369);A0A0A0MT44(hsa:2317);P62070(hsa:22800);P62136(hsa:5499);P01344(hsa:3481);P08962(hsa:967);A0A2R8YEA7(hsa:71;hsa:60);O60353(hsa:8323);A0A2R8Y5A3(hsa:1499)
hsa04141	Protein processing in endoplasmic reticulum	9	P60468(hsa:10952);O76024(hsa:7466);J3KPS0(hsa:54788);Q9H3Z4(hsa:80331);Q9BUN8(hsa:79139);P51571(hsa:6748);P30101(hsa:2923);P46977(hsa:3703);Q9UMX0(hsa:29979)
hsa05200	Pathways in cancer	9	P37173(hsa:7048);P19838(hsa:4790);Q9UKG1(hsa:26060);Q96II5(hsa:369);Q13485(hsa:4089);P55957(hsa:637);P20585(hsa:4437);O60353(hsa:8323);A0A2R8Y5A3(hsa:1499)
hsa04932	Non-alcoholic fatty liver disease (NAFLD)	9	P21912(hsa:6390);P19838(hsa:4790);Q99643(hsa:6391);P55957(hsa:637);P00395(hsa:4512);P06213(hsa:3643);P00403(hsa:4513);P00156(hsa:4519);P30613(hsa:5313)
hsa04015	Rap1 signaling pathway	8	F5GZG1(hsa:5908;hsa:5906);P06213(hsa:3643);P35916(hsa:2324);P09471(hsa:2775);A0A2R8YEA7(hsa:71;hsa:60);J3KN01(hsa:4301);A0A2R8Y5A3(hsa:1499);O94887(hsa:9855)
hsa04150	mTOR signaling pathway	8	Q9Y5K8(hsa:51382);Q96B36(hsa:84335);O75348(hsa:9550);Q9Y2Q5(hsa:28956);Q9Y376(hsa:51719);Q6R327(hsa:253260);P06213(hsa:3643);O60353(hsa:8323)
hsa04390	Hippo signaling pathway	8	P37173(hsa:7048);Q15334(hsa:3996);P62136(hsa:5499);Q13485(hsa:4089);A0A2R8YEA7(hsa:71;hsa:60);P36894(hsa:657);O60353(hsa:8323);A0A2R8Y5A3(hsa:1499)
hsa04530	Tight junction	8	P68366(hsa:7277);Q9Y3L5(hsa:57826);Q15334(hsa:3996);F5H6T1(hsa:10097);F5GZG1(hsa:5908;hsa:5906);P14649(hsa:140465);A0A2R8YEA7(hsa:71;hsa:60);J3KN01(hsa:4301)
hsa04610	Complement and coagulation cascades	8	P04004(hsa:7448);P02675(hsa:2244);P08697(hsa:5345);P05546(hsa:3053);A0A2R8Y3M9(hsa:81579;hsa:3426);P00740(hsa:2158);A0A0A0MRJ7(hsa:2153);A0A0G2JPR0(hsa:100293534;hsa:720;hsa:721)
hsa01230	Biosynthesis of amino acids	7	Q99707(hsa:4548);J3QKT4(hsa:5831);G3V2Y4(hsa:6472);P34897(hsa:6472);P60891(hsa:5631);P30613(hsa:5313);P04406(hsa:2597)
hsa01200	Carbon metabolism	7	P21912(hsa:6390);Q99643(hsa:6391);G3V2Y4(hsa:6472);P34897(hsa:6472);P60891(hsa:5631);P30613(hsa:5313);P04406(hsa:2597)
hsa04014	Ras signaling pathway	7	P19838(hsa:4790);P62070(hsa:22800);F5GZG1(hsa:5908;hsa:5906);P06213(hsa:3643);A0A2R8Y3M9(hsa:81579;hsa:3426);J3KN01(hsa:4301);P35916(hsa:2324)
hsa04510	Focal adhesion	7	P04004(hsa:7448);A0A0A0MT44(hsa:2317);P62136(hsa:5499);F5GZG1(hsa:5908;hsa:5906);A0A2R8Y5A3(hsa:1499);A0A2R8YEA7(hsa:71;hsa:60);P35916(hsa:2324)
hsa04520	Adherens junction	7	P37173(hsa:7048);Q13485(hsa:4089);P06213(hsa:3643);A0A2R8YEA7(hsa:71;hsa:60);J3KN01(hsa:4301);A0A2R8Y5A3(hsa:1499);O94887(hsa:9855)
hsa04068	FoxO signaling pathway	6	P37173(hsa:7048);Q96II5(hsa:369);P53350(hsa:5347);P04179(hsa:6648);Q13485(hsa:4089);P06213(hsa:3643)
hsa05210	Colorectal cancer	6	P37173(hsa:7048);Q9UKG1(hsa:26060);Q96II5(hsa:369);Q13485(hsa:4089);P20585(hsa:4437);A0A2R8Y5A3(hsa:1499)
hsa05132	Salmonella infection	6	O15145(hsa:10094);P19838(hsa:4790);A0A0A0MT44(hsa:2317);F8WCF6(hsa:10093;hsa:100526693);A0A2R8YEA7(hsa:71;hsa:60);P84095(hsa:391)
hsa05131	Shigellosis	6	O15145(hsa:10094);P19838(hsa:4790);Q96JJ3(hsa:63916);F8WCF6(hsa:10093;hsa:100526693);A0A2R8YEA7(hsa:71;hsa:60);P84095(hsa:391)
hsa05100	Bacterial invasion of epithelial cells	6	O15145(hsa:10094);Q96JJ3(hsa:63916);F8WCF6(hsa:10093;hsa:100526693);A0A2R8YEA7(hsa:71;hsa:60);P84095(hsa:391);A0A2R8Y5A3(hsa:1499)
hsa05166	HTLV-I infection	6	P37173(hsa:7048);P05141(hsa:292);P12236(hsa:293);Q13485(hsa:4089);Q9Y4A5(hsa:8295);P19838(hsa:4790)
hsa00240	Pyrimidine metabolism	5	P19388(hsa:5434);Q9BZX2(hsa:7371);Q12882(hsa:1806);D6RFG8(hsa:1633);Q02127(hsa:1723)
hsa00230	Purine metabolism	5	P19388(hsa:5434);P60891(hsa:5631);D6RFG8(hsa:1633);P30613(hsa:5313);P54750(hsa:5136)
hsa03040	Spliceosome	5	P62304(hsa:6635);O60231(hsa:8449);P62318(hsa:6634);Q5TAL2(hsa:6631);J3KR35(hsa:151903)
hsa04010	MAPK signaling pathway	5	P37173(hsa:7048);P19838(hsa:4790);A0A0A0MT44(hsa:2317);P62070(hsa:22800);F5GZG1(hsa:5908;hsa:5906)
hsa04152	AMPK signaling pathway	5	Q96B36(hsa:84335);Q9Y376(hsa:51719);O95822(hsa:23417);P06213(hsa:3643);P61026(hsa:10890)
hsa04024	cAMP signaling pathway	5	J3KN01(hsa:4301);P19838(hsa:4790);P62070(hsa:22800);P62136(hsa:5499);F5GZG1(hsa:5908;hsa:5906)
hsa04550	Signaling pathways regulating pluripotency of stem cells	5	O15198(hsa:4093);Q13485(hsa:4089);P36894(hsa:657);O60353(hsa:8323);A0A2R8Y5A3(hsa:1499)
hsa04145	Phagosome	5	Q9Y5K8(hsa:51382);A0A2R8YEA7(hsa:71;hsa:60);O75348(hsa:9550);P68366(hsa:7277);P60468(hsa:10952)
hsa04211	Longevity regulating pathway	5	Q96B36(hsa:84335);P06213(hsa:3643);P19838(hsa:4790);P04179(hsa:6648);Q9UKG1(hsa:26060)
hsa04270	Vascular smooth muscle contraction	5	Q96II5(hsa:369);P68133(hsa:72;hsa:70;hsa:58);A0A2R8Y3M9(hsa:81579;hsa:3426);P62136(hsa:5499);P14649(hsa:140465)
hsa04260	Cardiac muscle contraction	5	P00403(hsa:4513);P67936(hsa:7171);P00156(hsa:4519);P00395(hsa:4512);P68133(hsa:72;hsa:70;hsa:58)
hsa05130	Pathogenic Escherichia coli infection	5	A0A2R8YEA7(hsa:71;hsa:60);O15145(hsa:10094);P68366(hsa:7277);A0A2R8Y5A3(hsa:1499);F8WCF6(hsa:10093;hsa:100526693)
hsa05034	Alcoholism	5	Q96II5(hsa:369);P62805(hsa:8366;hsa:8359;hsa:8370;hsa:8361;hsa:8368);Q8IUE6(hsa:317772);P62136(hsa:5499);P09471(hsa:2775)
hsa00983	Drug metabolism - other enzymes	4	Q9BZX2(hsa:7371);Q12882(hsa:1806);P08236(hsa:2990);P51580(hsa:7172)
hsa03013	RNA transport	4	O75817(hsa:10248);O95149(hsa:10073);Q9NRG9(hsa:8086);O75818(hsa:10799)
hsa04151	PI3K-Akt signaling pathway	4	P04004(hsa:7448);P06213(hsa:3643);P19838(hsa:4790);P35916(hsa:2324)
hsa04022	cGMP-PKG signaling pathway	4	P12236(hsa:293);P06213(hsa:3643);P05141(hsa:292);P62136(hsa:5499)
hsa04020	Calcium signaling pathway	4	P12236(hsa:293);P05141(hsa:292);P54750(hsa:5136);Q99571(hsa:5025)
hsa04350	TGF-beta signaling pathway	4	P37173(hsa:7048);Q13485(hsa:4089);P36894(hsa:657);O15198(hsa:4093)
hsa04066	HIF-1 signaling pathway	4	P04406(hsa:2597);P02787(hsa:7018);P06213(hsa:3643);P19838(hsa:4790)
hsa04210	Apoptosis	4	P55957(hsa:637);P19838(hsa:4790);P68366(hsa:7277);A0A2R8YEA7(hsa:71;hsa:60)
hsa04921	Oxytocin signaling pathway	4	A0A2R8YEA7(hsa:71;hsa:60);P09471(hsa:2775);P62136(hsa:5499);P14649(hsa:140465)
hsa04910	Insulin signaling pathway	4	Q96II5(hsa:369);P06213(hsa:3643);P62136(hsa:5499);P30613(hsa:5313)
hsa04670	Leukocyte transendothelial migration	4	A0A2R8YEA7(hsa:71;hsa:60);J3KN01(hsa:4301);A0A2R8Y5A3(hsa:1499);F5GZG1(hsa:5908;hsa:5906)
hsa04611	Platelet activation	4	A0A2R8YEA7(hsa:71;hsa:60);P02675(hsa:2244);P62136(hsa:5499);F5GZG1(hsa:5908;hsa:5906)
hsa05220	Chronic myeloid leukemia	4	Q96II5(hsa:369);Q13485(hsa:4089);P19838(hsa:4790);P37173(hsa:7048)
hsa05212	Pancreatic cancer	4	Q96II5(hsa:369);Q13485(hsa:4089);P19838(hsa:4790);P37173(hsa:7048)
hsa05224	Breast cancer	4	Q96II5(hsa:369);P35916(hsa:2324);O60353(hsa:8323);A0A2R8Y5A3(hsa:1499)
hsa05410	Hypertrophic cardiomyopathy (HCM)	4	A0A2R8YEA7(hsa:71;hsa:60);P17661(hsa:1674);P68133(hsa:72;hsa:70;hsa:58);P67936(hsa:7171)
hsa05414	Dilated cardiomyopathy	4	A0A2R8YEA7(hsa:71;hsa:60);P17661(hsa:1674);P68133(hsa:72;hsa:70;hsa:58);P67936(hsa:7171)
hsa05418	Fluid shear stress and atherosclerosis	4	A0A2R8YEA7(hsa:71;hsa:60);P19838(hsa:4790);P36894(hsa:657);A0A2R8Y5A3(hsa:1499)
hsa01523	Antifolate resistance	4	P41440(hsa:6573);P19838(hsa:4790);G3V2Y4(hsa:6472);P34897(hsa:6472)
hsa04931	Insulin resistance	4	Q15257(hsa:5524);P06213(hsa:3643);P19838(hsa:4790);P62136(hsa:5499)
hsa05322	Systemic lupus erythematosus	4	P62318(hsa:6634);A0A0G2JPR0(hsa:100293534;hsa:720;hsa:721);Q8IUE6(hsa:317772);P62805(hsa:8366;hsa:8359;hsa:8370;hsa:8361;hsa:8368)
hsa05120	Epithelial cell signaling in Helicobacter pylori infection	4	Q9Y5K8(hsa:51382);O75348(hsa:9550);P19838(hsa:4790);Q9Y2X7(hsa:28964)
hsa05110	Vibrio cholerae infection	4	Q9Y5K8(hsa:51382);A0A2R8YEA7(hsa:71;hsa:60);O75348(hsa:9550);P60468(hsa:10952)
hsa05168	Herpes simplex infection	4	P05114(hsa:3150);P19838(hsa:4790);Q9NZM5(hsa:29997);P62136(hsa:5499)
hsa00330	Arginine and proline metabolism	3	I3L2W1(hsa:224);J3QKT4(hsa:5831);Q9BSE5(hsa:79814)
hsa00010	Glycolysis / Gluconeogenesis	3	P04406(hsa:2597);I3L2W1(hsa:224);P30613(hsa:5313)
hsa00620	Pyruvate metabolism	3	Q04760(hsa:2739);I3L2W1(hsa:224);P30613(hsa:5313)
hsa00860	Porphyrin and chlorophyll metabolism	3	Q7KZN9(hsa:1355);P50336(hsa:5498);P08236(hsa:2990)
hsa00670	One carbon pool by folate	3	Q99707(hsa:4548);G3V2Y4(hsa:6472);P34897(hsa:6472)
hsa00410	beta-Alanine metabolism	3	O95822(hsa:23417);I3L2W1(hsa:224);Q12882(hsa:1806)
hsa03015	mRNA surveillance pathway	3	Q6UN15(hsa:81608);E9PLP8(hsa:1479);P62136(hsa:5499)
hsa03008	Ribosome biogenesis in eukaryotes	3	O75817(hsa:10248);O75818(hsa:10799);Q9NVN8(hsa:54552)
hsa04310	Wnt signaling pathway	3	Q13485(hsa:4089);O60353(hsa:8323);A0A2R8Y5A3(hsa:1499)
hsa04071	Sphingolipid signaling pathway	3	Q86VZ5(hsa:259230);P55957(hsa:637);P19838(hsa:4790)
hsa04060	Cytokine-cytokine receptor interaction	3	P37173(hsa:7048);P36894(hsa:657);P25106(hsa:57007)
hsa04216	Ferroptosis	3	A6NCE7(hsa:81631;hsa:643246);P02792(hsa:2512);P02787(hsa:7018)
hsa04140	Autophagy - animal	3	Q96B36(hsa:84335);O95721(hsa:9342);P62070(hsa:22800)
hsa04142	Lysosome	3	A0A140T8X7(hsa:9374);P08236(hsa:2990);P08962(hsa:967)
hsa04146	Peroxisome	3	P39210(hsa:4358);O95822(hsa:23417);P04179(hsa:6648)
hsa04213	Longevity regulating pathway - multiple species	3	Q96B36(hsa:84335);P06213(hsa:3643);P04179(hsa:6648)
hsa04261	Adrenergic signaling in cardiomyocytes	3	P67936(hsa:7171);P68133(hsa:72;hsa:70;hsa:58);P62136(hsa:5499)
hsa04972	Pancreatic secretion	3	O00194(hsa:5874);A0A2R8Y3M9(hsa:81579;hsa:3426);F5GZG1(hsa:5908;hsa:5906)
hsa04919	Thyroid hormone signaling pathway	3	A0A2R8YEA7(hsa:71;hsa:60);A0A494C0K7(hsa:9442);A0A2R8Y5A3(hsa:1499)
hsa04916	Melanogenesis	3	O60353(hsa:8323);A0A2R8Y5A3(hsa:1499);P09471(hsa:2775)
hsa04659	Th17 cell differentiation	3	P37173(hsa:7048);Q13485(hsa:4089);P19838(hsa:4790)
hsa04666	Fc gamma R-mediated phagocytosis	3	O15145(hsa:10094);F8WCF6(hsa:10093;hsa:100526693);E9PC47(hsa:3984)
hsa04721	Synaptic vesicle cycle	3	Q9Y5K8(hsa:51382);O75348(hsa:9550);A0A1B0GVV9(hsa:6812)
hsa04720	Long-term potentiation	3	Q96II5(hsa:369);P62136(hsa:5499);F5GZG1(hsa:5908;hsa:5906)
hsa05203	Viral carcinogenesis	3	P19838(hsa:4790);Q92759(hsa:2968);P62805(hsa:8366;hsa:8359;hsa:8370;hsa:8361;hsa:8368)
hsa05215	Prostate cancer	3	Q96II5(hsa:369);P19838(hsa:4790);A0A2R8Y5A3(hsa:1499)
hsa05412	Arrhythmogenic right ventricular cardiomyopathy (ARVC)	3	A0A2R8YEA7(hsa:71;hsa:60);P17661(hsa:1674);A0A2R8Y5A3(hsa:1499)
hsa04933	AGE-RAGE signaling pathway in diabetic complications	3	P37173(hsa:7048);Q13485(hsa:4089);P19838(hsa:4790)
hsa05142	Chagas disease (American trypanosomiasis)	3	P37173(hsa:7048);P19838(hsa:4790);P09471(hsa:2775)
hsa00260	Glycine, serine and threonine metabolism	2	G3V2Y4(hsa:6472);P34897(hsa:6472)
hsa00280	Valine, leucine and isoleucine degradation	2	P21953(hsa:594);I3L2W1(hsa:224)
hsa00270	Cysteine and methionine metabolism	2	Q99707(hsa:4548);Q9BV20(hsa:84245)
hsa00630	Glyoxylate and dicarboxylate metabolism	2	G3V2Y4(hsa:6472);P34897(hsa:6472)
hsa00562	Inositol phosphate metabolism	2	Q4KWH8(hsa:23007);Q01968(hsa:4952)
hsa00020	Citrate cycle (TCA cycle)	2	P21912(hsa:6390);Q99643(hsa:6391)
hsa00640	Propanoate metabolism	2	P21953(hsa:594);O95822(hsa:23417)
hsa00510	N-Glycan biosynthesis	2	P46977(hsa:3703);Q9NP73(hsa:79868)
hsa00514	Other types of O-glycan biosynthesis	2	Q4G148(hsa:283464);Q9H488(hsa:23509)
hsa00590	Arachidonic acid metabolism	2	P22352(hsa:2878);A0A2R8Y3M9(hsa:81579;hsa:3426)
hsa00790	Folate biosynthesis	2	Q96EN8(hsa:55034);Q03393(hsa:5805)
hsa00480	Glutathione metabolism	2	O95881(hsa:51060);P22352(hsa:2878)
hsa03060	Protein export	2	P67812(hsa:23478);P60468(hsa:10952)
hsa04130	SNARE interactions in vesicular transport	2	O95721(hsa:9342);H7C1N3(hsa:10282)
hsa03018	RNA degradation	2	Q9H9A5(hsa:25904);Q9NQT4(hsa:56915)
hsa00970	Aminoacyl-tRNA biosynthesis	2	Q6PI48(hsa:55157);O95363(hsa:10667)
hsa04371	Apelin signaling pathway	2	Q13485(hsa:4089);P62070(hsa:22800)
hsa04072	Phospholipase D signaling pathway	2	P06213(hsa:3643);P62070(hsa:22800)
hsa04215	Apoptosis - multiple species	2	P55957(hsa:637);Q9UMX3(hsa:666)
hsa04110	Cell cycle	2	Q13485(hsa:4089);P53350(hsa:5347)
hsa04114	Oocyte meiosis	2	P53350(hsa:5347);P62136(hsa:5499)
hsa04115	p53 signaling pathway	2	P55957(hsa:637);P27701(hsa:3732)
hsa04137	Mitophagy - animal	2	P62979(hsa:7311;hsa:6233;hsa:7316;hsa:7314);P62070(hsa:22800)
hsa04380	Osteoclast differentiation	2	P37173(hsa:7048);P19838(hsa:4790)
hsa04978	Mineral absorption	2	P02792(hsa:2512);P02787(hsa:7018)
hsa04914	Progesterone-mediated oocyte maturation	2	Q96II5(hsa:369);P53350(hsa:5347)
hsa04966	Collecting duct acid secretion	2	Q9Y5K8(hsa:51382);O75348(hsa:9550)
hsa04650	Natural killer cell mediated cytotoxicity	2	P55957(hsa:637);Q96II5(hsa:369)
hsa04621	NOD-like receptor signaling pathway	2	P19838(hsa:4790);Q9H6X2(hsa:84168)
hsa04622	RIG-I-like receptor signaling pathway	2	Q96G74(hsa:55593);P19838(hsa:4790)
hsa04623	Cytosolic DNA-sensing pathway	2	P19388(hsa:5434);P19838(hsa:4790)
hsa04062	Chemokine signaling pathway	2	P19838(hsa:4790);F5GZG1(hsa:5908;hsa:5906)
hsa04722	Neurotrophin signaling pathway	2	P19838(hsa:4790);F5GZG1(hsa:5908;hsa:5906)
hsa04730	Long-term depression	2	Q96II5(hsa:369);P09471(hsa:2775)
hsa04723	Retrograde endocannabinoid signaling	2	P03891(hsa:4536);P09471(hsa:2775)
hsa04726	Serotonergic synapse	2	Q96II5(hsa:369);P09471(hsa:2775)
hsa04728	Dopaminergic synapse	2	P62136(hsa:5499);P09471(hsa:2775)
hsa04740	Olfactory transduction	2	Q8NGA1(hsa:125963);P54750(hsa:5136)
hsa05206	MicroRNAs in cancer	2	P19838(hsa:4790);P08670(hsa:7431)
hsa05202	Transcriptional misregulation in cancer	2	P37173(hsa:7048);P19838(hsa:4790)
hsa05221	Acute myeloid leukemia	2	Q96II5(hsa:369);P19838(hsa:4790)
hsa05213	Endometrial cancer	2	Q96II5(hsa:369);A0A2R8Y5A3(hsa:1499)
hsa05211	Renal cell carcinoma	2	Q96II5(hsa:369);F5GZG1(hsa:5908;hsa:5906)
hsa05217	Basal cell carcinoma	2	O60353(hsa:8323);A0A2R8Y5A3(hsa:1499)
hsa05416	Viral myocarditis	2	A0A2R8YEA7(hsa:71;hsa:60);P55957(hsa:637)
hsa01524	Platinum drug resistance	2	P55957(hsa:637);P20585(hsa:4437)
hsa04930	Type II diabetes mellitus	2	P06213(hsa:3643);P30613(hsa:5313)
hsa05323	Rheumatoid arthritis	2	Q9Y5K8(hsa:51382);O75348(hsa:9550)
hsa05150	Staphylococcus aureus infection	2	A0A0G2JPR0(hsa:100293534;hsa:720;hsa:721);A0A2R8Y3M9(hsa:81579;hsa:3426)
hsa05133	Pertussis	2	P19838(hsa:4790);A0A0G2JPR0(hsa:100293534;hsa:720;hsa:721)
hsa05152	Tuberculosis	2	P55957(hsa:637);P19838(hsa:4790)
hsa05144	Malaria	2	P69905(hsa:3039;hsa:3040);P04921(hsa:2995)
hsa05145	Toxoplasmosis	2	P19838(hsa:4790);P09471(hsa:2775)
hsa05169	Epstein-Barr virus infection	2	P19838(hsa:4790);P08670(hsa:7431)
hsa05164	Influenza A	2	A0A2R8YEA7(hsa:71;hsa:60);P19838(hsa:4790)
hsa05160	Hepatitis C	2	Q96II5(hsa:369);P19838(hsa:4790)
hsa05161	Hepatitis B	2	Q13485(hsa:4089);P19838(hsa:4790)
hsa05014	Amyotrophic lateral sclerosis (ALS)	2	Q9BUN8(hsa:79139);P55957(hsa:637)
hsa05032	Morphine addiction	2	P54750(hsa:5136);P09471(hsa:2775)
hsa00360	Phenylalanine metabolism	1	P14174(hsa:4282)
hsa00310	Lysine degradation	1	I3L2W1(hsa:224)
hsa00250	Alanine, aspartate and glutamate metabolism	1	P08243(hsa:440)
hsa00380	Tryptophan metabolism	1	I3L2W1(hsa:224)
hsa00350	Tyrosine metabolism	1	P14174(hsa:4282)
hsa00340	Histidine metabolism	1	I3L2W1(hsa:224)
hsa00030	Pentose phosphate pathway	1	P60891(hsa:5631)
hsa00520	Amino sugar and nucleotide sugar metabolism	1	P34949(hsa:4351)
hsa00040	Pentose and glucuronate interconversions	1	P08236(hsa:2990)
hsa00051	Fructose and mannose metabolism	1	P34949(hsa:4351)
hsa00053	Ascorbate and aldarate metabolism	1	I3L2W1(hsa:224)
hsa01212	Fatty acid metabolism	1	A0A140T8X7(hsa:9374)
hsa00534	Glycosaminoglycan biosynthesis - heparan sulfate / heparin	1	Q9UBQ6(hsa:2135)
hsa00531	Glycosaminoglycan degradation	1	P08236(hsa:2990)
hsa00532	Glycosaminoglycan biosynthesis - chondroitin sulfate / dermatan sulfate	1	Q70JA7(hsa:337876)
hsa00561	Glycerolipid metabolism	1	I3L2W1(hsa:224)
hsa00565	Ether lipid metabolism	1	A0A2R8Y3M9(hsa:81579;hsa:3426)
hsa00564	Glycerophospholipid metabolism	1	A0A2R8Y3M9(hsa:81579;hsa:3426)
hsa00600	Sphingolipid metabolism	1	Q86VZ5(hsa:259230)
hsa00592	alpha-Linolenic acid metabolism	1	A0A2R8Y3M9(hsa:81579;hsa:3426)
hsa00591	Linoleic acid metabolism	1	A0A2R8Y3M9(hsa:81579;hsa:3426)
hsa00062	Fatty acid elongation	1	A0A140T8X7(hsa:9374)
hsa00100	Steroid biosynthesis	1	Q14534(hsa:6713)
hsa00071	Fatty acid degradation	1	I3L2W1(hsa:224)
hsa00770	Pantothenate and CoA biosynthesis	1	Q12882(hsa:1806)
hsa00450	Selenocompound metabolism	1	Q99707(hsa:4548)
hsa00980	Metabolism of xenobiotics by cytochrome P450	1	P07099(hsa:2052)
hsa03050	Proteasome	1	Q92530(hsa:9491)
hsa04120	Ubiquitin mediated proteolysis	1	Q969T4(hsa:10477)
hsa03440	Homologous recombination	1	Q92547(hsa:11073)
hsa03420	Nucleotide excision repair	1	Q92759(hsa:2968)
hsa03430	Mismatch repair	1	P20585(hsa:4437)
hsa03410	Base excision repair	1	P49916(hsa:3980)
hsa03022	Basal transcription factors	1	Q92759(hsa:2968)
hsa03020	RNA polymerase	1	P19388(hsa:5434)
hsa04012	ErbB signaling pathway	1	Q96II5(hsa:369)
hsa04340	Hedgehog signaling pathway	1	Q2M1P5(hsa:374654)
hsa04392	Hippo signaling pathway -multiple species	1	Q6V1P9(hsa:54798)
hsa04064	NF-kappa B signaling pathway	1	P19838(hsa:4790)
hsa04070	Phosphatidylinositol signaling system	1	Q01968(hsa:4952)
hsa04668	TNF signaling pathway	1	P19838(hsa:4790)
hsa04080	Neuroactive ligand-receptor interaction	1	Q99571(hsa:5025)
hsa04512	ECM-receptor interaction	1	P04004(hsa:7448)
hsa04540	Gap junction	1	P68366(hsa:7277)
hsa04360	Axon guidance	1	E9PC47(hsa:3984)
hsa04975	Fat digestion and absorption	1	A0A2R8Y3M9(hsa:81579;hsa:3426)
hsa04976	Bile secretion	1	P07099(hsa:2052)
hsa04977	Vitamin digestion and absorption	1	P41440(hsa:6573)
hsa04915	Estrogen signaling pathway	1	P09471(hsa:2775)
hsa04924	Renin secretion	1	P54750(hsa:5136)
hsa04923	Regulation of lipolysis in adipocytes	1	P06213(hsa:3643)
hsa04920	Adipocytokine signaling pathway	1	P19838(hsa:4790)
hsa04614	Renin-angiotensin system	1	O75787(hsa:10159)
hsa04918	Thyroid hormone synthesis	1	P22352(hsa:2878)
hsa03320	PPAR signaling pathway	1	P62979(hsa:7311;hsa:6233;hsa:7316;hsa:7314)
hsa04913	Ovarian steroidogenesis	1	P06213(hsa:3643)
hsa04917	Prolactin signaling pathway	1	P19838(hsa:4790)
hsa04713	Circadian entrainment	1	P09471(hsa:2775)
hsa04962	Vasopressin-regulated water reabsorption	1	Q9UJW0(hsa:51164)
hsa04960	Aldosterone-regulated sodium reabsorption	1	P06213(hsa:3643)
hsa04658	Th1 and Th2 cell differentiation	1	P19838(hsa:4790)
hsa04620	Toll-like receptor signaling pathway	1	P19838(hsa:4790)
hsa04612	Antigen processing and presentation	1	P30101(hsa:2923)
hsa04660	T cell receptor signaling pathway	1	P19838(hsa:4790)
hsa04662	B cell receptor signaling pathway	1	P19838(hsa:4790)
hsa04657	IL-17 signaling pathway	1	P19838(hsa:4790)
hsa04725	Cholinergic synapse	1	P09471(hsa:2775)
hsa04724	Glutamatergic synapse	1	P09471(hsa:2775)
hsa04727	GABAergic synapse	1	P09471(hsa:2775)
hsa04750	Inflammatory mediator regulation of TRP channels	1	P62136(hsa:5499)
hsa04742	Taste transduction	1	P54750(hsa:5136)
hsa05204	Chemical carcinogenesis	1	P07099(hsa:2052)
hsa05216	Thyroid cancer	1	A0A2R8Y5A3(hsa:1499)
hsa05218	Melanoma	1	Q96II5(hsa:369)
hsa05219	Bladder cancer	1	Q96II5(hsa:369)
hsa05222	Small cell lung cancer	1	P19838(hsa:4790)
hsa05214	Glioma	1	Q96II5(hsa:369)
hsa05223	Non-small cell lung cancer	1	Q96II5(hsa:369)
hsa01521	EGFR tyrosine kinase inhibitor resistance	1	Q96II5(hsa:369)
hsa01522	Endocrine resistance	1	Q96II5(hsa:369)
hsa04950	Maturity onset diabetes of the young	1	P30613(hsa:5313)
hsa05321	Inflammatory bowel disease (IBD)	1	P19838(hsa:4790)
hsa05134	Legionellosis	1	P19838(hsa:4790)
hsa05143	African trypanosomiasis	1	P69905(hsa:3039;hsa:3040)
hsa05140	Leishmaniasis	1	P19838(hsa:4790)
hsa05146	Amoebiasis	1	P19838(hsa:4790)
hsa05162	Measles	1	P19838(hsa:4790)
hsa05030	Cocaine addiction	1	P19838(hsa:4790)
hsa05031	Amphetamine addiction	1	P62136(hsa:5499)
